# Supplementary material for: Porous material for absorption and luminescent detection of aromatic molecules in water
Source: Royal Society of Chemistry journal article supplement (doi:10.1039/b517002h), 2006-01-01
Supplement: b517002h.pdf [file b517002h.pdf]

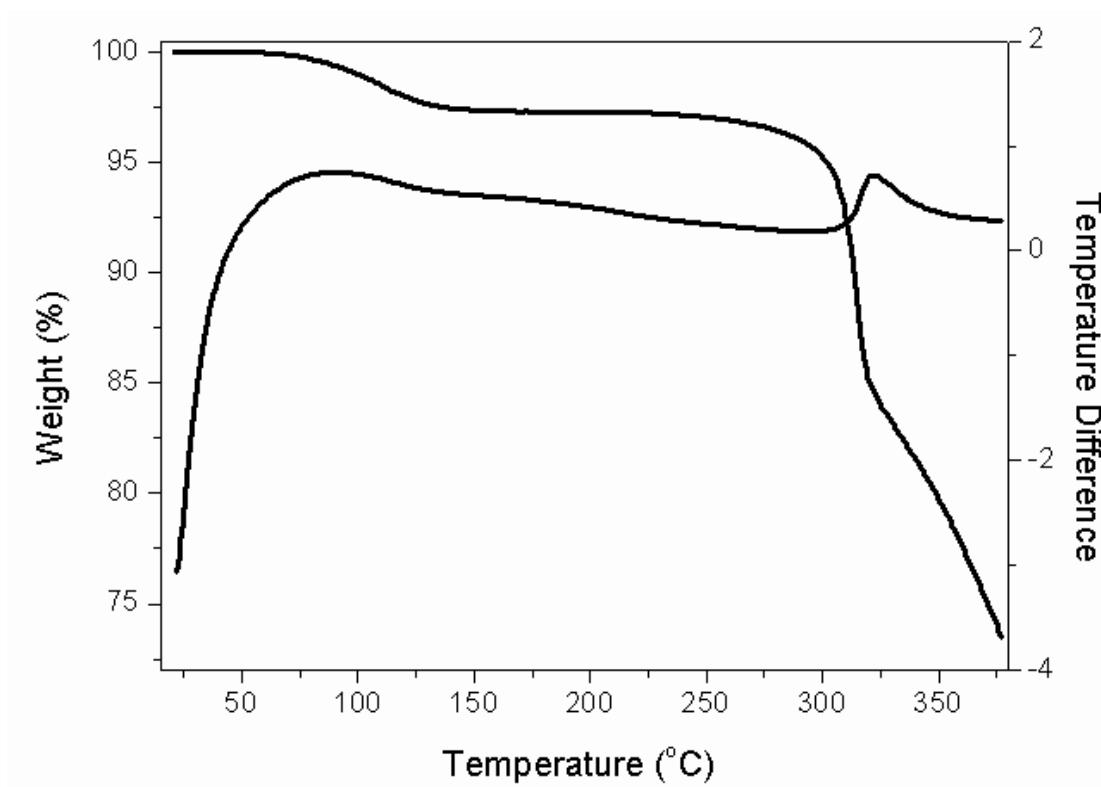

Figure S1. EG and TGA of compound 1 from 35 to 370°C.

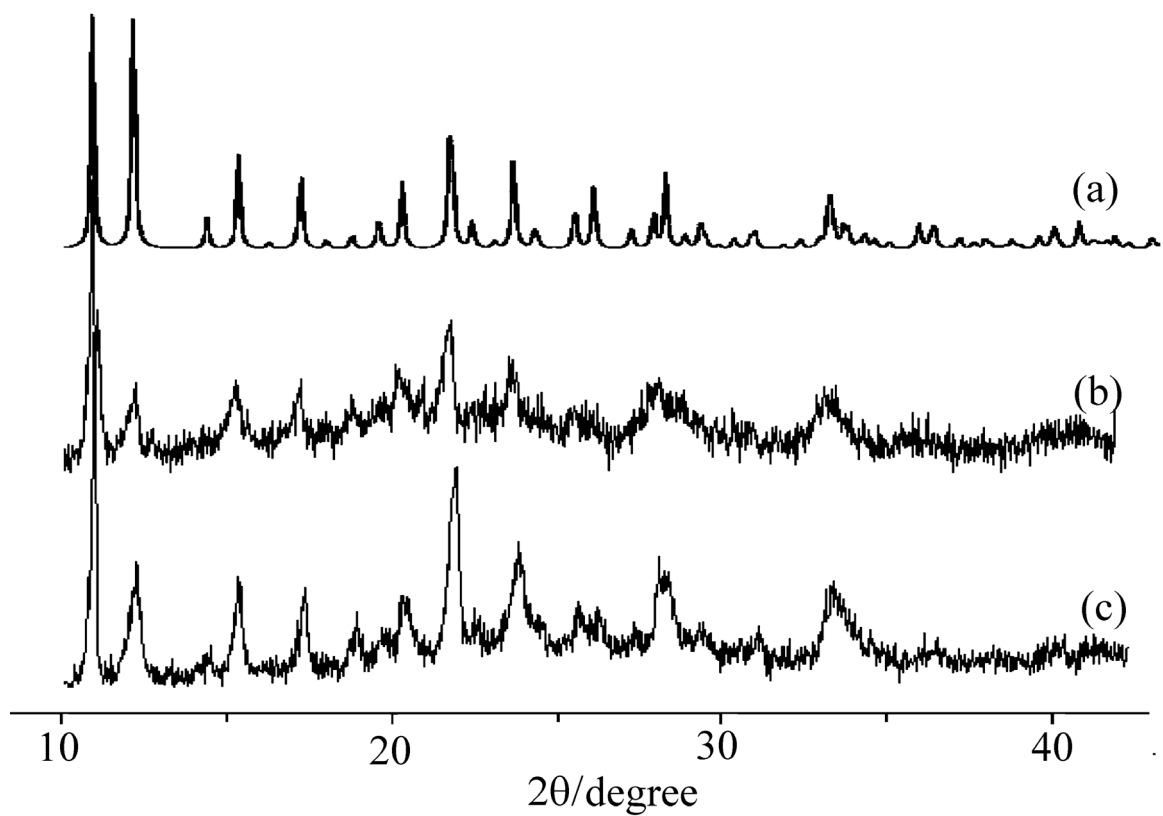

Figure S2. X-ray powder diffraction pattern for porous materials (a) calculated from the single-crystal data of the compound **1**; b) desolvated host framework prepared by drying **1** at 120 for 6hrs under vacuum; c) desolvated host framework immersed in a toluene solution.

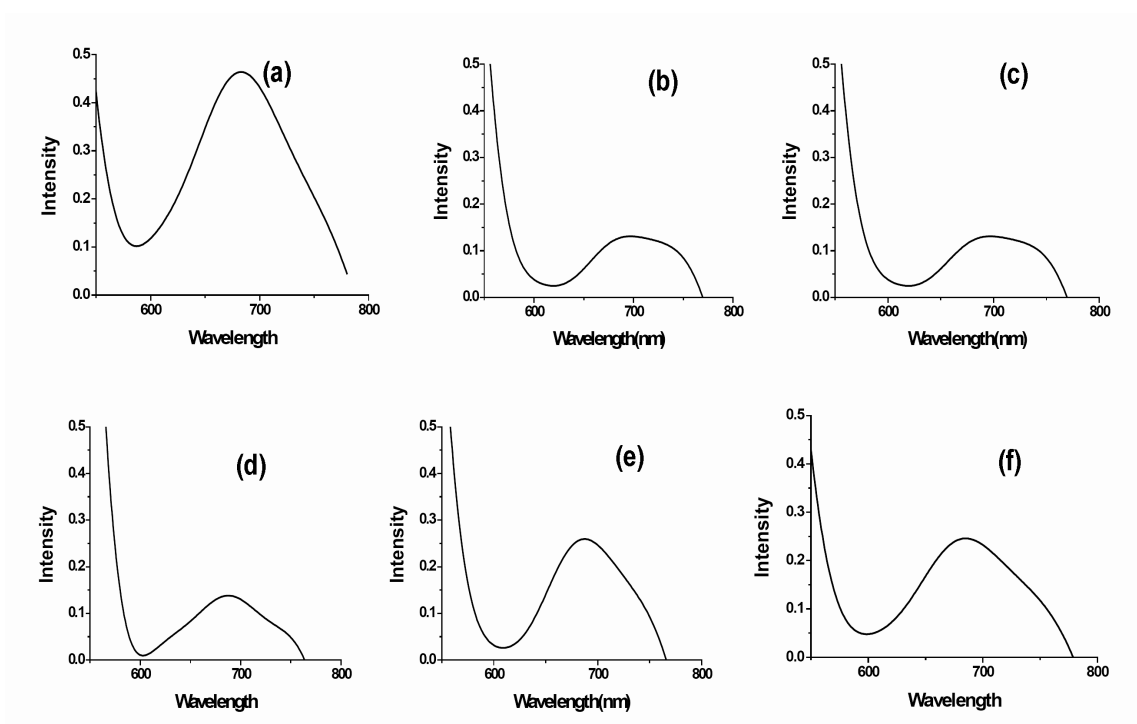

Figure S3 Luminescent spectra of desolvated solid 2, (a) and after absorbed nitrobenzene (b), aniline (c) *o*-dimethylbenzene (d) *p*-dimethylbenzene (e) and *m*-dimethylbenzene (f) in aqueous solution (0.5%wt) for 6hrs, respectively.

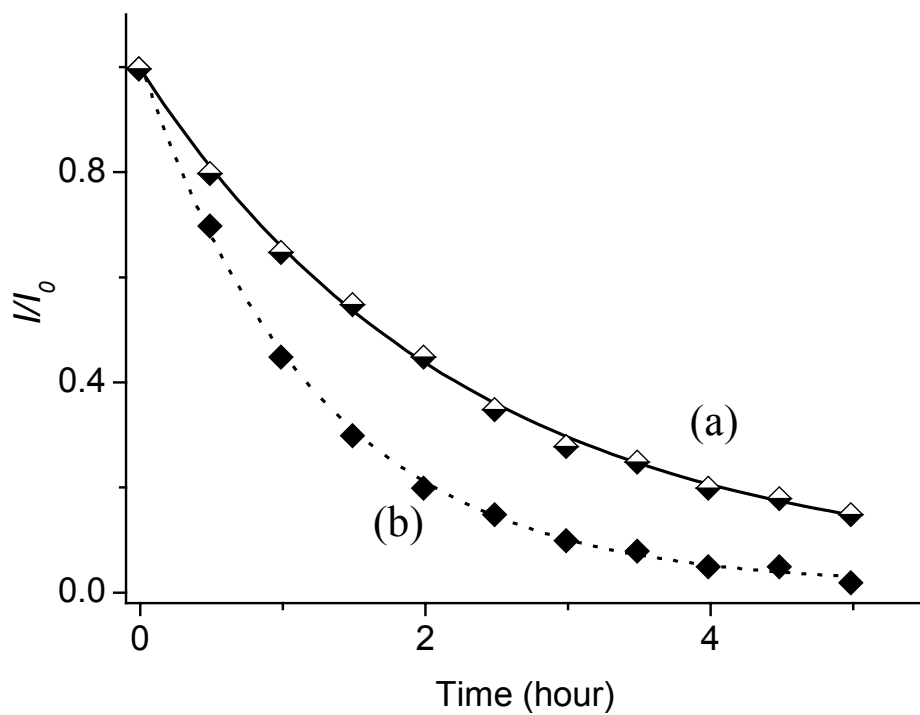

Figure S4 the relative fluorescence intensity of the porous material after absorbed toluene in aqueous solution as a function of time (hour) (a: 0.5%wt; b: 1%wt)
